# Supplementary material
Source: Atypon-hosted journal article supplement (doi:10.1287/ijoc.2024.0765)

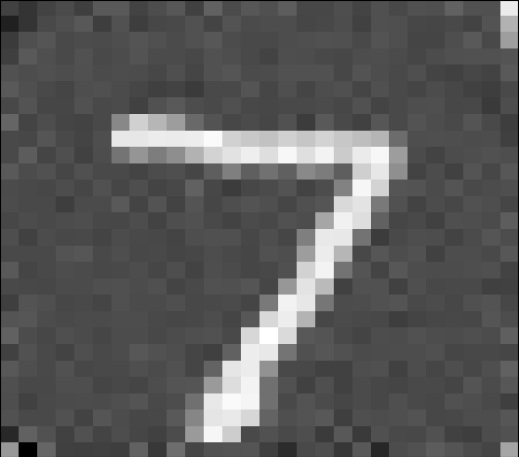

FedAvg

Supplement: ijoc.2024.0765.cd.zip [file 7_fedavg.pdf › 2024.0765-main/simulate_DLG/7_fedavg.pdf]

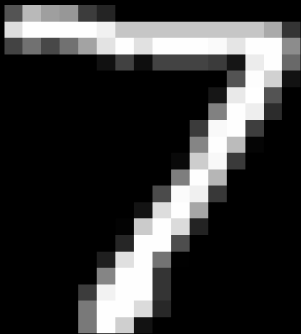

Original

Supplement: ijoc.2024.0765.cd.zip [file 7_original.pdf › 2024.0765-main/simulate_DLG/7_original.pdf]

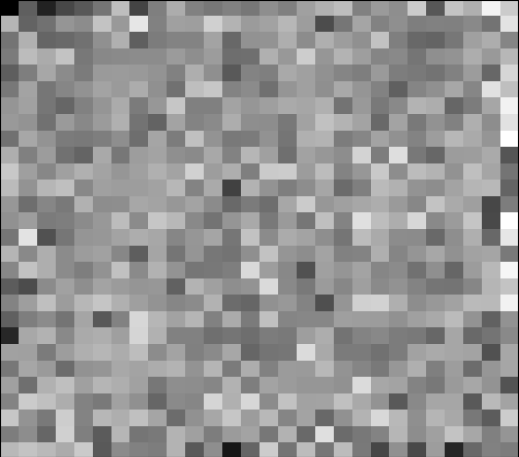

Ours

Supplement: ijoc.2024.0765.cd.zip [file 7_ours.pdf › 2024.0765-main/simulate_DLG/7_ours.pdf]
